# Supplementary material
Source: PubMed Central journal article supplement (PMC3215043)
Supplement: 1110530108_pnas.201110530SI.pdf [file 1110530108_pnas.201110530SI.pdf]

# Supporting Information

De Luca et al. 10.1073/pnas.1110530108

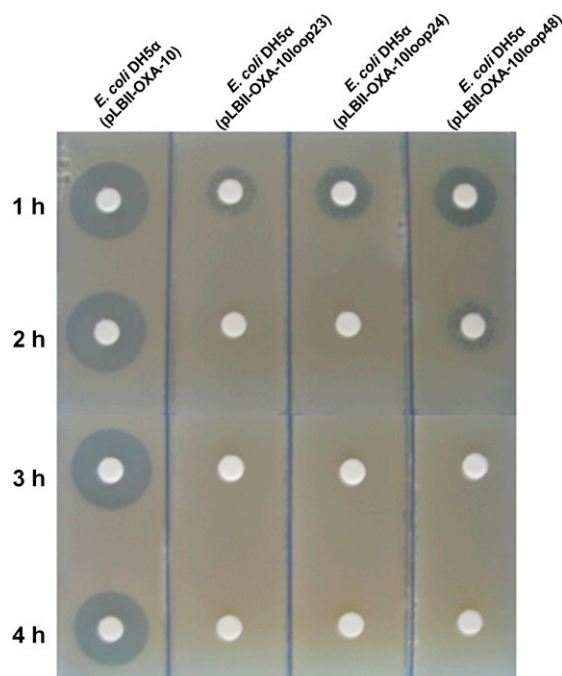

**Fig. S1.** Results of the carbapenemase plate assay (see *Materials and Methods* for details) obtained after incubating imipenem with crude extracts of *Escherichia coli* DH5 $\alpha$  carrying plasmids pLBII-OXA10, pLBII-OXA10loop23, pLBII-OXA10loop24, and pLBII-OXA10loop48 producing the wild-type and the OXA-10 loop variants in which the  $\beta$ 5– $\beta$ 6 loop has been substituted with that found in the carbapenemases OXA-23, OXA-24, and OXA-48, respectively. A strain carrying the empty vector was used as a negative control and gave results similar to that observed with *E. coli* DH5 $\alpha$ (pLBII-OXA10) (Table 2).

**Table S1. Peptide mass fingerprint analysis performed on purified OXA-10 and OXA-10 loop variants**

| Enzyme       | Fragment sequence                                       | Calculated mass (Da) | Observed mass (Da) |
|--------------|---------------------------------------------------------|----------------------|--------------------|
| OXA-10       | T <sup>206</sup> GFSGVGTESNPGVAWWWVGVVEK <sup>228</sup> | 2450.18              | 2449.93            |
| OXA-10loop24 | T <sup>206</sup> GWGMGVTPQVGWWWVGVVEK <sup>228</sup>    | 2260.10              | 2260.10            |
| OXA-10loop48 | T <sup>206</sup> GYSTR/IEPK/IGWWWVGVVEK <sup>228</sup>  | 1259.66              | 1259.51            |

Only the peptide fragment(s) including the  $\beta$ 5– $\beta$ 6 loop residues, obtained after trypsin proteolysis, are shown. Additional trypsin cleavage sites were introduced in the OXA-10loop48 variant (as indicated by the backslashes), generating two additional small peptide fragments which could not be observed in our setup; thus, the size reported in the table refers to the fragment including residues I<sup>219</sup>–K<sup>228</sup>.
